# Supplementary material
Source: PubMed Central journal article supplement (PMC8162121)

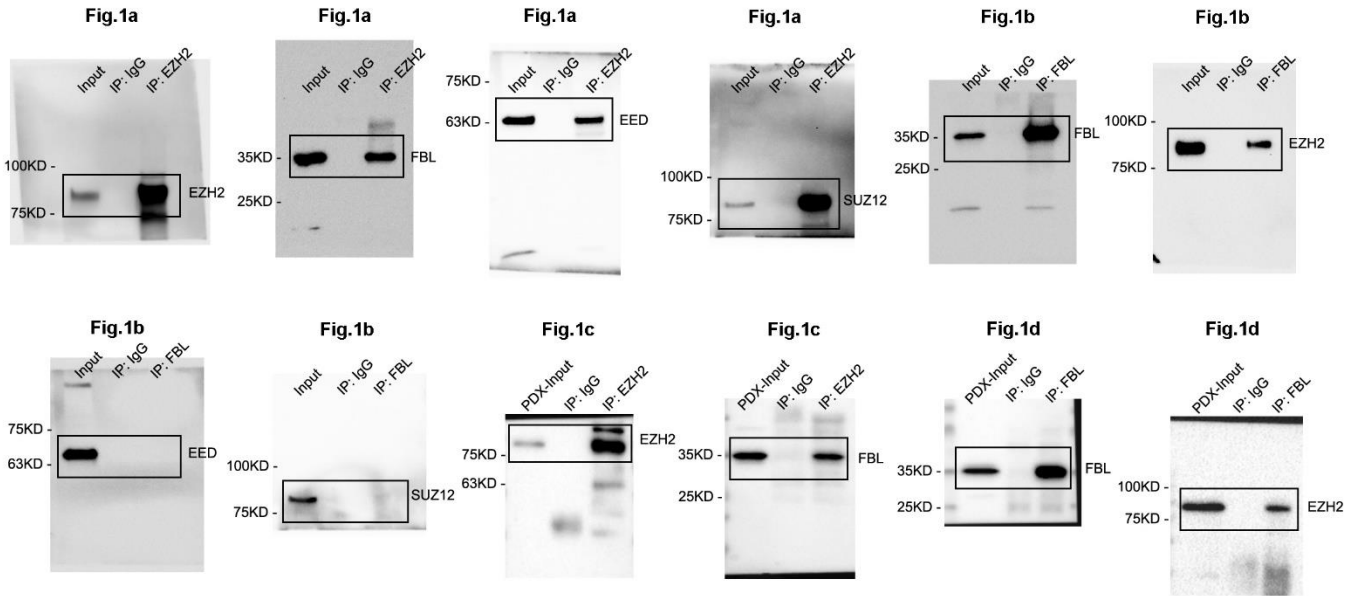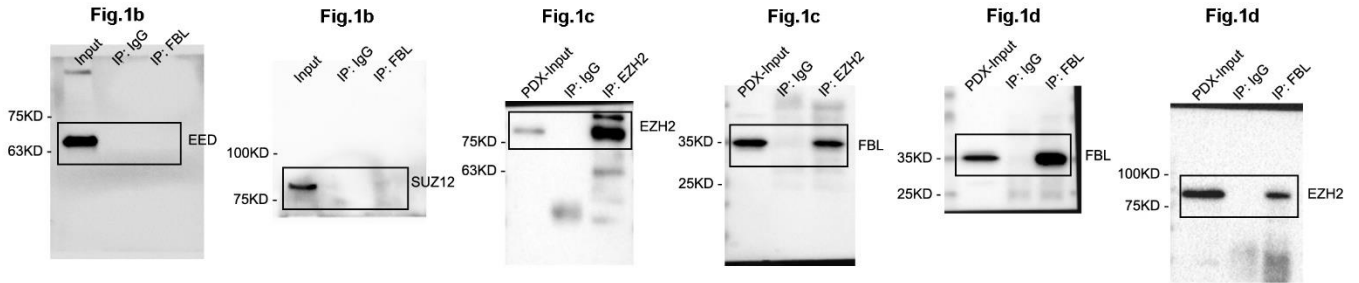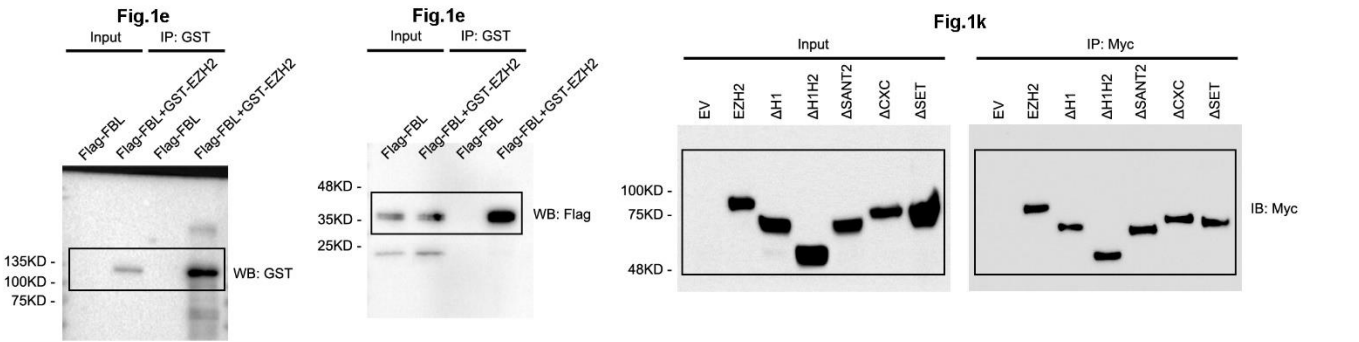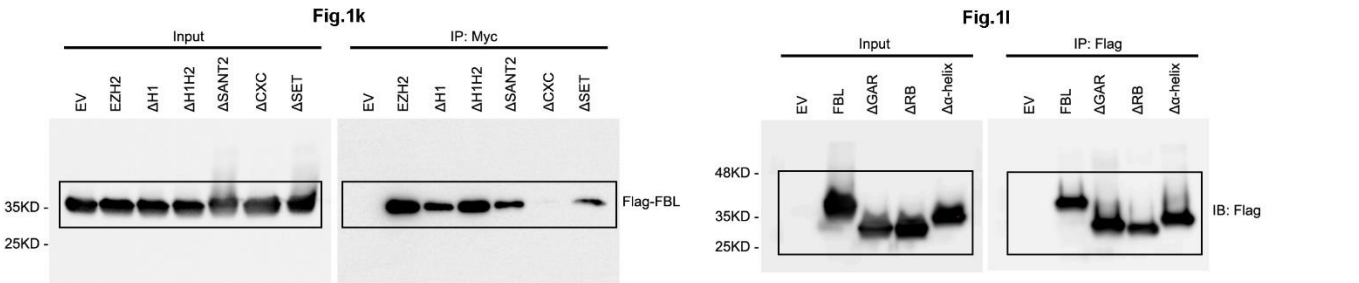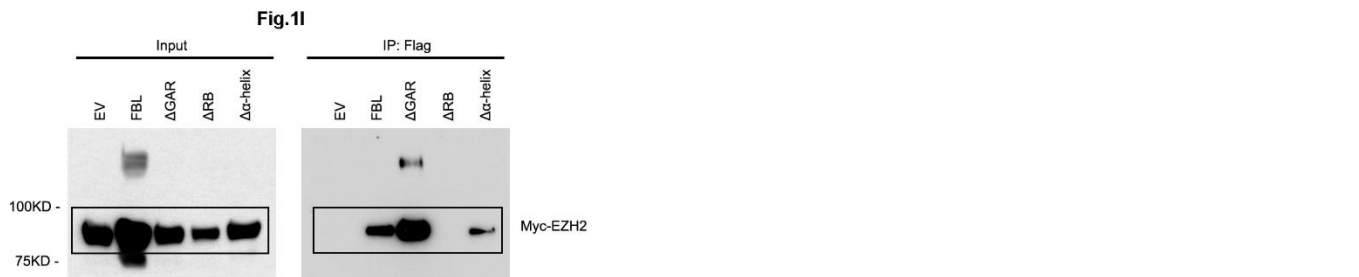

Supplement: NIHMS1698128-supplement-Source_Data_Fig__1_Unprocessed_western_blots_andor_gels.pdf [file NIHMS1698128-supplement-Source_Data_Fig__1_Unprocessed_western_blots_andor_gels.pdf]

Fig.2c

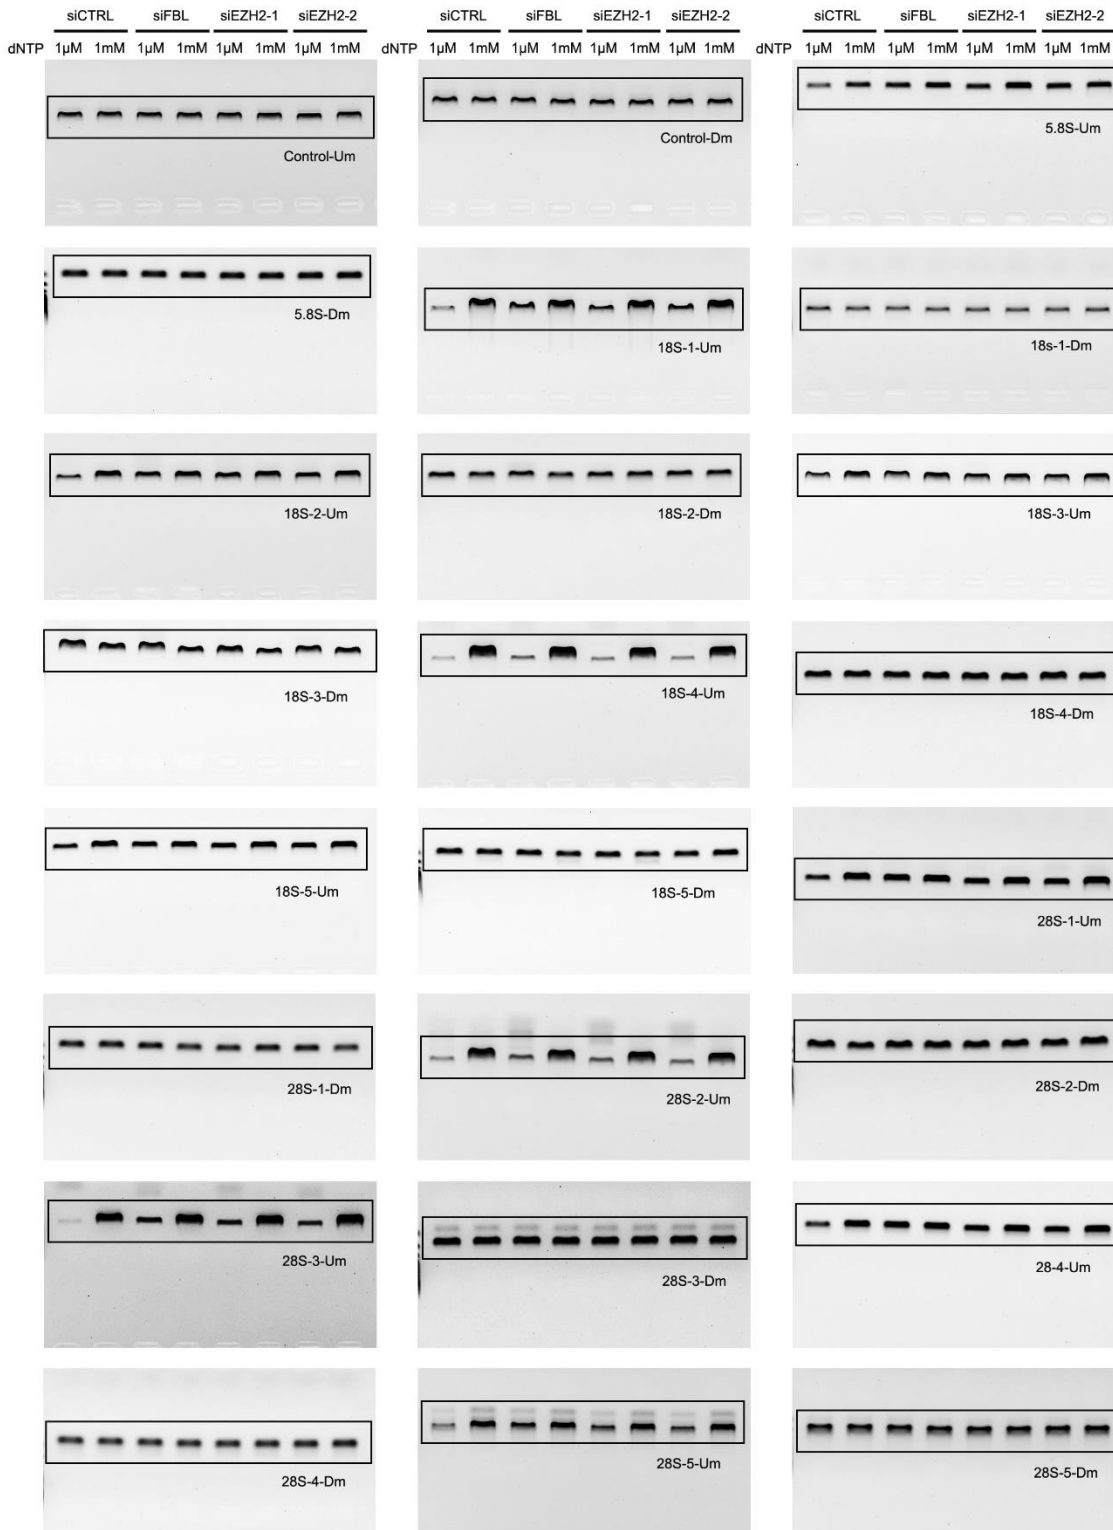

Supplement: NIHMS1698128-supplement-Source_Data_Fig__2_Unprocessed_western_blots_andor_gels.pdf [file NIHMS1698128-supplement-Source_Data_Fig__2_Unprocessed_western_blots_andor_gels.pdf]

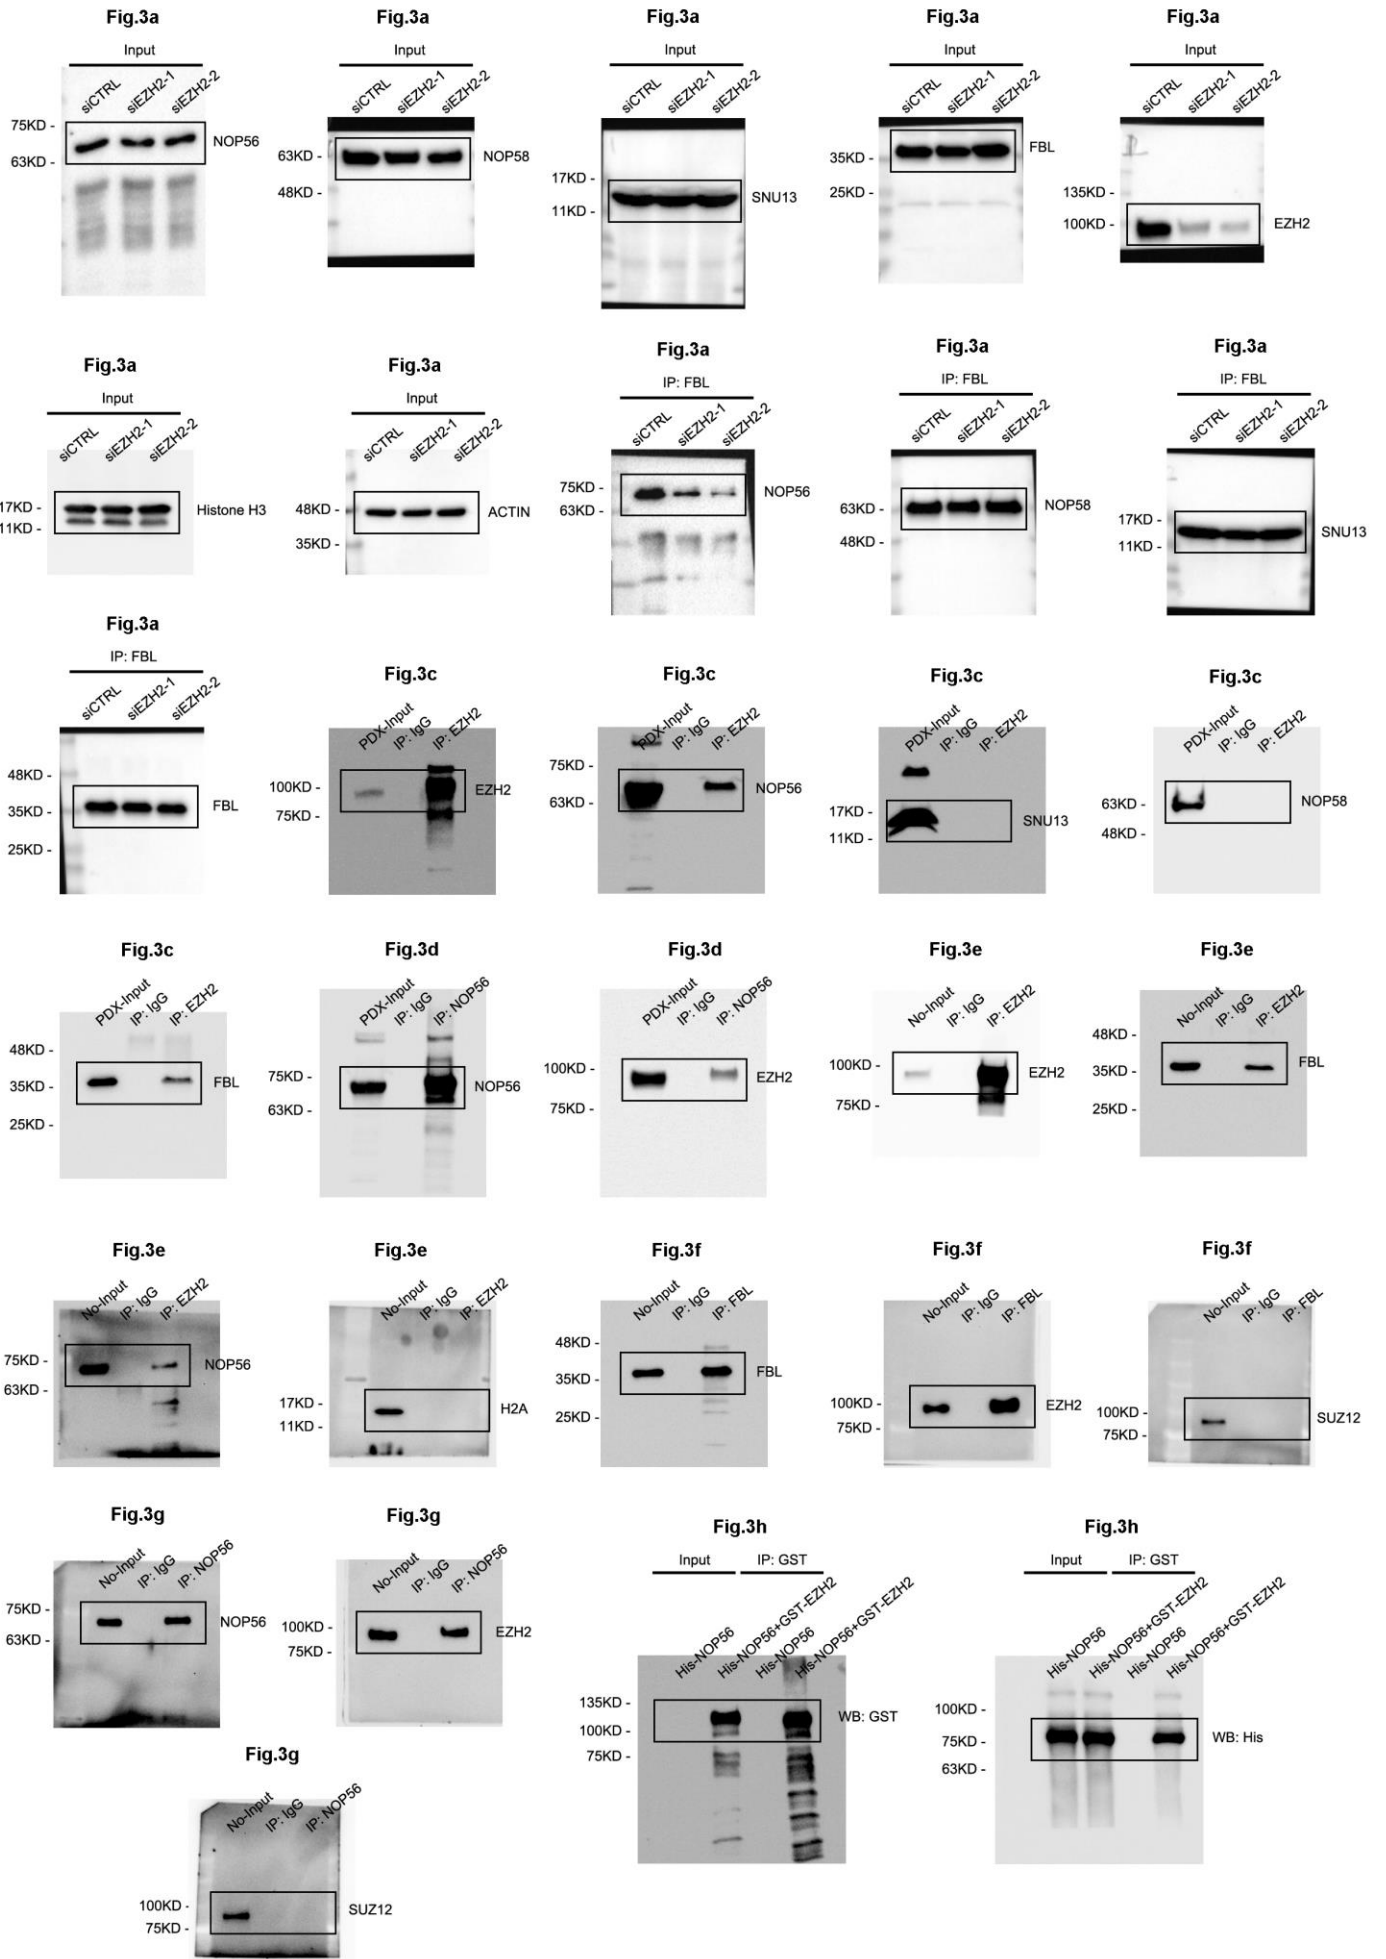

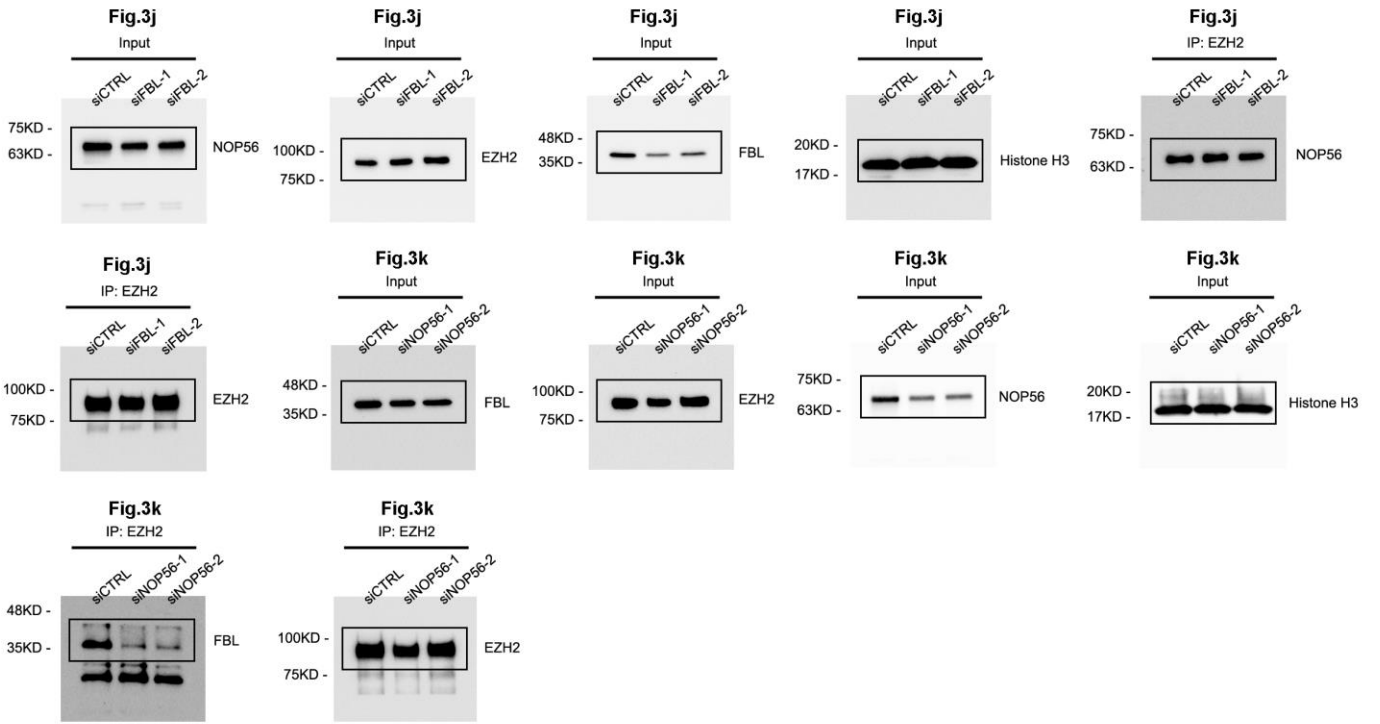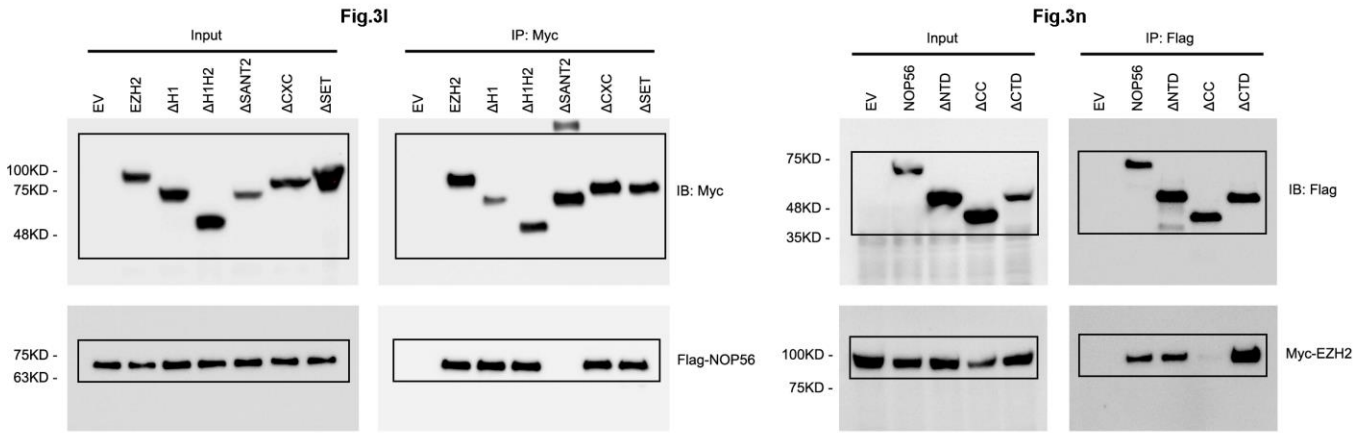

Supplement: NIHMS1698128-supplement-Source_Data_Fig__3_Unprocessed_western_blots_andor_gels.pdf [file NIHMS1698128-supplement-Source_Data_Fig__3_Unprocessed_western_blots_andor_gels.pdf]

Fig.4a

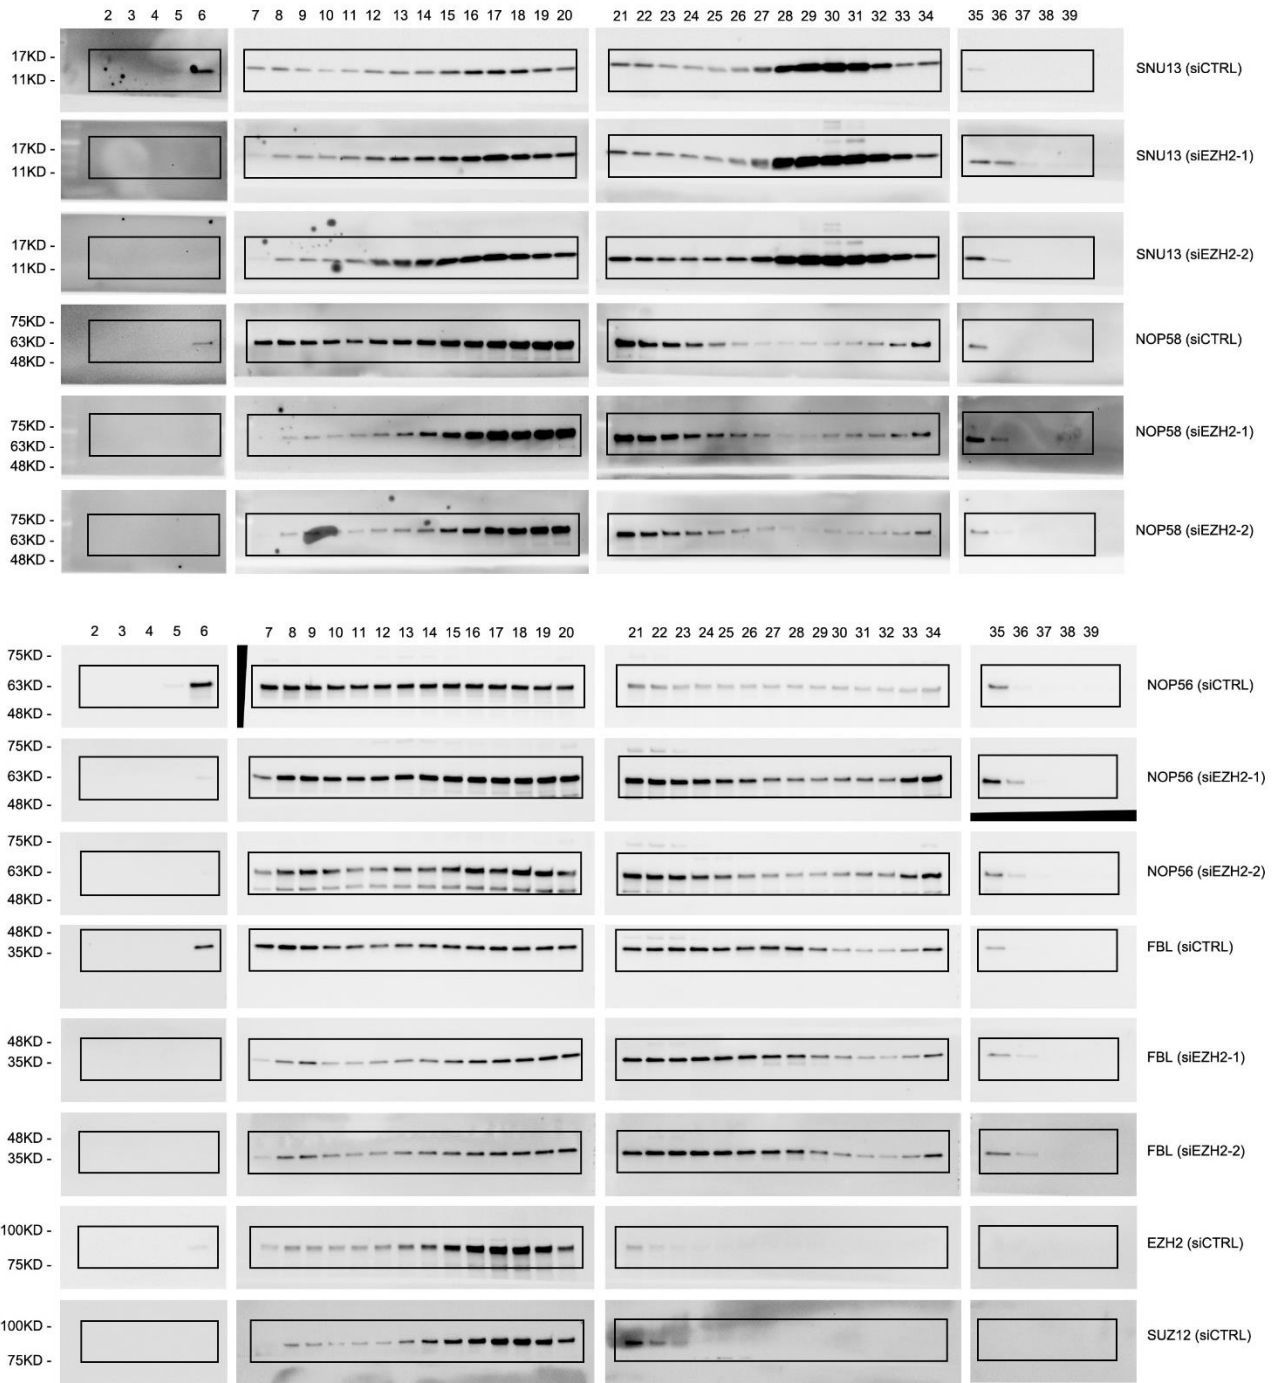

Supplement: NIHMS1698128-supplement-Source_Data_Fig__4_Unprocessed_western_blots_andor_gels.pdf [file NIHMS1698128-supplement-Source_Data_Fig__4_Unprocessed_western_blots_andor_gels.pdf]

**Fig.5e**

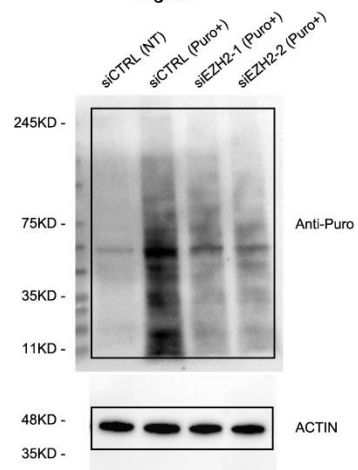

Supplement: NIHMS1698128-supplement-Source_Data_Fig__5_Unprocessed_western_blots_andor_gels.pdf [file NIHMS1698128-supplement-Source_Data_Fig__5_Unprocessed_western_blots_andor_gels.pdf]

**Fig.6h**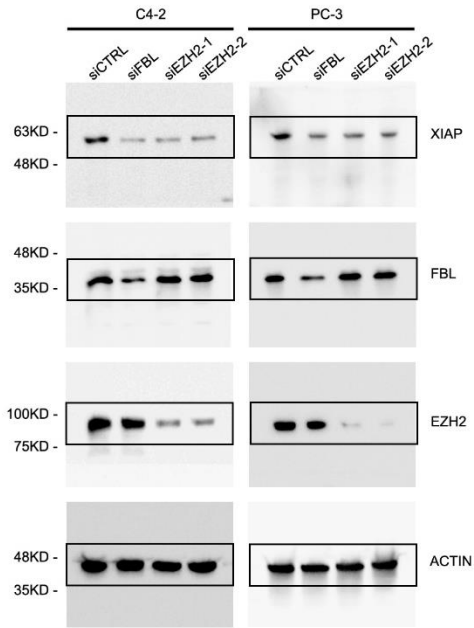**Fig.6j**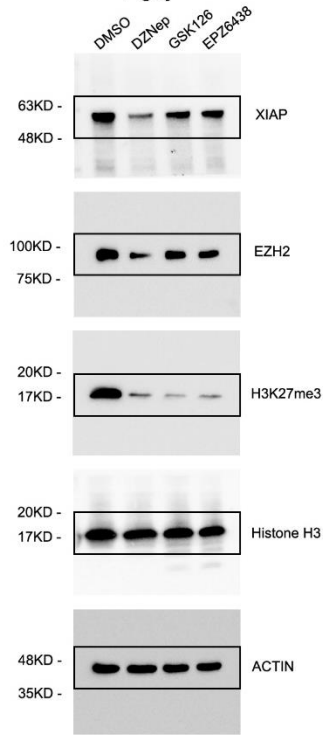**Fig.6k**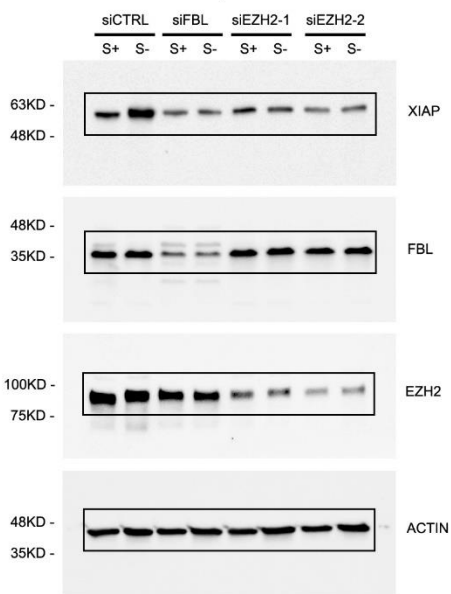**Fig.6l**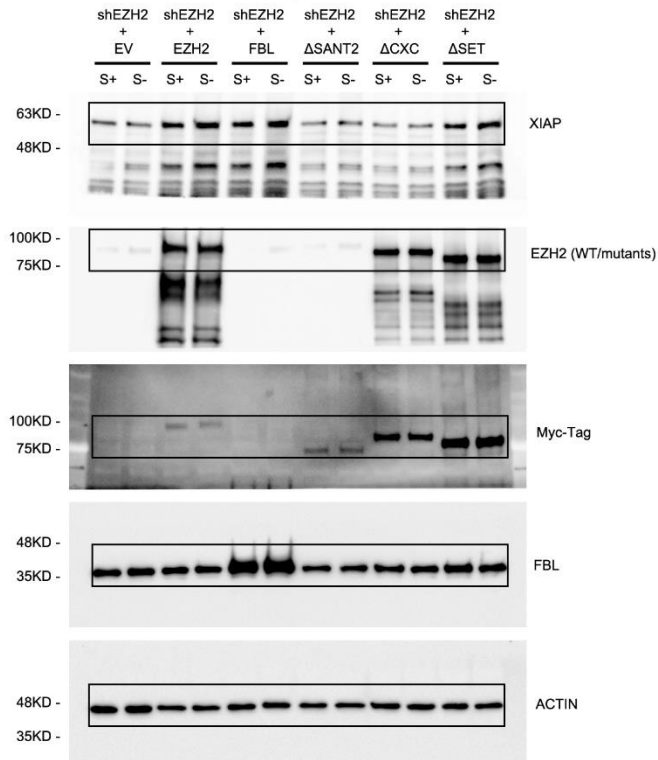

Supplement: NIHMS1698128-supplement-Source_Data_Fig__6_Unprocessed_western_blots_andor_gels.pdf [file NIHMS1698128-supplement-Source_Data_Fig__6_Unprocessed_western_blots_andor_gels.pdf]
